# Supplementary material for: Coupling of permeabilized microorganisms for efficient enantioselective reduction of ketone with cofactor recycling
Source: Royal Society of Chemistry journal article supplement (doi:10.1039/b515721h), 2005-12-12
Supplement: b515721h.pdf [file b515721h.pdf]

# **Supplementary Information**

## **Coupling of permeabilized microorganisms for efficient enantioselective reduction of ketone with cofactor recycling**

*Jie Zhang, Bernard Witholt, and Zhi Li\**

Institute of Biotechnology, ETH-Hönggerberg, CH-8093 Zürich, Switzerland

[zhi@biotech.biol.ethz.ch](mailto:zhi@biotech.biol.ethz.ch)

**Analytic conditions.** Analysis of conversion of **1** to **2** by GC. Column: Chrompack Optima-5 (25 m × 0.32 mm); temperature program: 50 °C for 10 min, increase to 280 °C at a rate of 10 °C/min, keep at 280 °C for 2 min. Retention time: 2.01 and 5.25 min for **1**, 4.16 min for **2**.

Analysis of ee of compound **2** by GC. Column: Lipodex-A (25 m × 0.25 mm); temperature program: 40 °C to 120 °C at 5 °C/min, increase to 170 °C at 45 °C /min; retention time: 11.89 min for (*S*)-**2** and 12.21 min for (*R*)-**2**.

Analysis of conversion of **3** to **4** by HPLC. Column: Nucleosil 120-5 C18 (125 mm × 8 mm). Eluent: acetonitrile/10mM K-phosphate Buffer (pH = 7.0), 1/9; flow rate: 0.5 mL/min; UV detection: 210 nm; Retention time: 3.1 min for **3**, 1.32 min for **4**.

Analysis of ee of compound **4** by HPLC. Column: Chiralcel OB-H (250 mm × 4.6 mm); eluent: *n*-hexane/2-propanol 75/25; flow rate: 0.5ml/min; UV detection: 210 nm; retention time: 15.6 min for (+)-**4** and 21.2 min for (-)-**4**.

**Production of cells.** *Bacillus pumilus* Phe-C3 was grown in 1/2 Evans medium<sup>13</sup> containing 50 mM glucose and 5 mM phenylalanine in a shaking flask at 25 °C and 300 rpm. The cells were harvested at the late exponential phase at 36 h with an OD<sub>450</sub> of 8.6. *Pseudomonas* sp. Tyr-F10 was grown in 1/2 Evans medium containing 50 mM glucose and 5 mM tyrosine in a shaking flask at 25°C and 300 rpm. The cells were harvested at the late exponential phase with an OD<sub>450</sub> of 9.5 at 15 h. *Bacillus subtilis* BGSC 1A1 were grown in 1/2 Evans medium containing 50 mM glucose and 0.05% yeast extract in a shaking flask at 37°C and 250 rpm. The cells were harvested at the late exponential phase

at 11 h with an OD<sub>450</sub> of 6.2. The cell pellets of all three strains were separately kept at -80°C for further biotransformation.

***Coupling of permeabilized cells of B. pumilus Phe-C3 and B. subtilis BGSC 1A1 for bioreduction of ethyl 3-keto-4,4,4-trifluorobutyrate 1 (20 mM) at an initial NADP<sup>+</sup> concentration of 0.20 mM.*** To a suspension of permeabilized cells of *B. pumilus* Phe-C3 (6.7 g cdw/L) and *B. subtilis* BGSC 1A1 (13-27 g cdw/L) in 10 mL 100 mM Tris-buffer (pH = 7.0) was added substrate **1** (18.4 mg, 0.10 mmol, 10 mM), glucose (100 mg, 0.55 mmol, 55 mM), and NADP<sup>+</sup> (1.6 mg, 2.0 μmol, 0.20 mM). The mixture was shaken at 300 rpm and 25°C. Additional substrate **1** (15.8 mg, 0.086 mmol, 10 mM) was added at 9 h. 200 μL aliquots were taken out at different time point for analysis. After centrifugation, 100 μL supernatant was diluted with 400 μL Tris-buffer (pH = 8.0) and then extracted with 500 μL chloroform containing 2 mM hexadecane as the internal standard. The organic phase was separated, dried over Na<sub>2</sub>SO<sub>4</sub>, and filtrated. The samples were used for the analysis of conversion and the ee of the product ethyl 3-hydroxy-4,4,4-trifluorobutyrate (*R*)-**2**. The results are summarized in Table 1 and Figure S-1.

***Coupling of permeabilized cells of Pseudomonas sp. Tyr-F10 and B. subtilis BGSC 1A1 for bioreduction of methyl 3-keto-3-(3'-pyridyl)-propionate 3 (20 mM) at an initial NADP<sup>+</sup> concentration of 0.20 mM.*** To a suspension of permeabilized cells of *Pseudomonas* sp. Tyr-F10 (6.7 g cdw/L) and *B. subtilis* BGSC 1A1 (13-27 g cdw/L) in 10 mL 100 mM Tris-buffer (pH = 8.0) was added substrate **3** (17.9 mg, 0.10 mmol, 10 mM), glucose (100 mg, 0.55 mmol, 55 mM), and NADP<sup>+</sup> (1.6 mg, 2.0 μmol, 0.20 mM).

The mixture was shaken at 300 rpm and 25°C. Additional substrate **3** (15.4 mg, 0.086 mmol, 10 mM) was added at 9 h. At different time point, 200 µL aliquots were taken out for analysis. After centrifugation, 100 µL supernatant was mixed with 400 µL Tris-buffer (PH = 8.0) with 5 mM benzyl acetone as the internal standard; the samples were used for the analysis of the conversion of the product methyl 3-hydroxyl-3-(3'-pyridyl)-propionate **4**. For the ee detection, the aqueous sample was extracted with CHCl<sub>3</sub>, the organic phase was dried over Na<sub>2</sub>SO<sub>4</sub>, filtrated and evaporated, and the residue was dissolved in *n*-hexane/2-propanol 75/2 for HPLC analysis. The results are summarized in Table 1 and Figure S-2.

***Bioreduction of ethyl 4,4,4-trifluorobutyrate 1 (120 mM) with permeabilized cells of B. pumilus Phe-C3 and B. subtilis BGSC 1A1 at different initial NADP<sup>+</sup> concentrations (0.04-0.20 mM).*** To a suspension of permeabilized cells of *B. pumilus* Phe-C3 (20 g cdw/L) and *B. subtilis* BGSC 1A1 (40 g cdw/L) in 10 mL Tris-buffer (pH = 7.0) was added NADP<sup>+</sup> (0.32-1.6 mg, 0.4-2.0 µmol, 0.04-0.20 mM), substrate **1** (110 mg, 0.60 mmol, 60 mM), and glucose (0.60 g, 3.3 mmol, 330 mM), and the mixtures were shaken at 25°C and 300 rpm. Additional substrate **1** was added at 5 h (91 mg, 0.49 mmol, 60 mM), and more glucose was supplied at 5 h (0.66 g, 3.7 mmol, 0.45 M), 10 h (0.44 g, 2.4 mmol, 0.32 M), 18 h (0.28 g, 1.6 mmol, 0.21 M), 22 h (0.27 g, 1.5 mmol, 0.21 M), and 26 h (0.25 g, 1.4 mmol, 0.21 M). Samples (300 µL) was taken at different time point, centrifuged, and 100 µL supernatant was diluted with 400 µL Tris-buffer (PH = 7.0), followed by extraction with 500 µL chloroform containing 2 mM hexadecane as the internal standard. The organic phase was separated, dried over Na<sub>2</sub>SO<sub>4</sub>, filtrated, and

analyzed by GC to quantify the concentration and ee of the product (*R*)-**2**. The reaction was stopped at 30 h, resulting in 6.4 mL reaction mixtures due to sample taking. The product concentration and TTN of the cofactor are shown in Figure 1 A-E, and the product formation is given in Figure S-3.

***Bioreduction of ethyl 4,4,4-trifluorobutyrate 1 (120 mM) with permeabilized cells of B. pumilus Phe-C3 and B. subtilis BGSC 1A1 at an initial NADP<sup>+</sup> concentration of 0.01 mM.*** To a suspension of permeabilized cells of *B. pumilus* Phe-C3 (20 g cdw/L) and *B. subtilis* BGSC 1A1 (40 g cdw/L) in 10 mL Tris-buffer (PH = 7.0) was added NADP<sup>+</sup> (0.08 mg, 0.10  $\mu$ mol, 0.01 mM), substrate **1** (110 mg, 0.6 mmol, 60 mM), and glucose (0.80 g, 4.4 mmol, 440 mM), and the mixtures were shaken at 25°C and 300 rpm. Additional substrate **1** was added at 5 h (97 mg, 0.53 mmol, 60 mM), and more glucose was supplied at 5 h (0.70 g, 3.9 mmol, 440 mM), 14 h (0.68 g, 3.8 mmol, 440 mM), 19 h (0.16 g, 0.91 mmol, 110 mM), 24 h (0.16 g, 0.9 mmol, 110 mM), 29 h (0.63 g, 3.5 mmol, 440 mM) and 38 h (0.61 g, 3.4 mmol, 440 mM). Aliquots (300  $\mu$ L) were taken at different time point, and samples were prepared and analyzed as described above. After 43 h reaction, 2.42 M glucose was added totally, and the volume of reaction mixtures reduced to 7.0 mL due to sample taking. 16.2 mM product (*R*)-**2** was formed in 92% ee, corresponding to a cofactor TTN of 1620. The product formation is given in Figure S-4.

***Bioreduction of ethyl 4,4,4-trifluorobutyrate 1 (140 mM) with permeabilized cells of B. pumilus Phe-C3 and B. subtilis BGSC 1A1 at an initial NADP<sup>+</sup> concentration of 0.12 mM for a longer reaction time.*** To a suspension of permeabilized cells of *B. pumilus*

Phe-C3 (20 g cdw/L) and *B. subtilis* BGSC 1A1 (40 g cdw/L) in 20 mL Tris-buffer (PH = 7.0) was added NADP<sup>+</sup> (1.9 mg, 2.4  $\mu$ mol, 0.12 mM), substrate **1** (221 mg, 1.2 mmol, 60 mM), and glucose (1.60 g, 8.89 mmol, 0.44 M), and the mixtures were shaken at 25°C and 300 rpm. Additional substrate **1** was added at 5 h (208 mg, 1.16 mmol, 60 mM) and at 24 h (65 mg, 0.36 mmol, 20 mM), and more glucose was supplied at 5 h (1.50 g, 8.33 mmol, 0.44 M), 14 h (1.11 g, 6.17 mmol, 0.33 M), 20 h (1.07 g, 5.94 mmol, 0.33 M), 28 h (1.38 g, 7.67 mmol, 0.44 M), 38 h (1.02 g, 5.67 mmol, 0.33 M), 44 h (0.98 g, 5.44 mmol, 0.33 M), 50 h (0.95 g, 5.28 mmol, 0.33 M), 53 h (0.93 g, 5.17 mmol, 0.33 M), and 62 h (0.91 g, 5.06 mmol, 0.33 M). Samples (300  $\mu$ L) was taken at different time point, extracted with chloroform, and analyzed by GC to quantify the product concentration and product ee. After 68 h reaction, 14.6 mL reaction mixtures remained after sample taking, and 114.4 mM (81.7% yield, 21 g/L) of ethyl 3-hydroxy-4,4,4-trifluorobutyrate (*R*)-**2** was formed in 91% ee with a TTN of cofactor of 953. The product formation is given in Figure S-5.

***Repeated use of the permeabilized cells for bioreduction of 1.*** Permeabilized cells of *B. pumilus* Phe-C3 (26.7 g cdw/L) and *B. subtilis* BGSC 1A1 (53.4 g/L) were suspended in 20 mL Tris-buffer (PH =7.0). NADP<sup>+</sup> (3.1 mg, 3.9  $\mu$ mol, 0.20 mM) was added, and the mixtures were shaken at 25°C and 300 rpm. Substrate **1** was added at 0 min (221 mg, 1.2 mmol, 60 mM), 5 h (208 mg, 1.13 mol, 60 mM), 24 h (62 mg, 0.034 mol, 20 mM). Glucose was added at 0 min (1.60 g, 8.89 mmol, 0.44 M), 5 h (1.50 g, 8.33 mmol, 0.44 M), 14 h (1.09 g, 6.06 mmol, 0.33 M), 20 h (1.06 g, 5.89 mmol, 0.33 M), 24 h (1.00 g, 5.56 mmol, 0.33 M), 30 h (1.30 g, 7.22 mmol, 0.44 M), 49 h (0.91 g, 5.06 mmol, 0.33 M)

and the total glucose concentration is 2.64 M. 200  $\mu$ L aliquot were taken at different time points, extracted with chloroform, and analyzed by GC and chiral GC. After 67 h, 14.4 mL reaction solution was remained. 123.7 mM (88%, 331 mg, 1.78 mmol) of (*R*)-**2** (23 g/L) was formed in 91% e.e.

The permeabilized cells after the 67 h biotransformation described above was harvested and washed twice with Tris-buffer (PH = 7.0). The cells were suspended in 11 mL Tris-buffer (PH = 7.0) to a concentration of 78.3 g cdw/L which is nearly the same as in the first run reduction. The bio-reduction of **1** was performed at the same condition as described above with externally added NADP<sup>+</sup> (1.8 mg, 2.3  $\mu$ mol, 0.20 mM). Substrate **1** was added at 0 min (121 mg, 0.66 mmol, 60 mM) and 5 h (113 mg, 0.61 mmol, 60 mM), and glucose was added at different time point as described for the first run. 102 mM (85%, 152 mg, 0.82 mmol) product (*R*)-**2** was obtained in 8.0 ml remaining reaction solution after 67 h, corresponding to a product concentration of 19 g/L.

For the third time transformation, the cells after the 67 h from the second run were centrifuged, washed and suspended in 7.0 mL Tris-buffer (PH = 7.0) to a cell density of 78.3 g cdw/L. NADP<sup>+</sup> (1.1 mg, 1.4  $\mu$ mol, 0.20 mM) was added initially, and substrate was added at 0 min (77 mg, 0.42 mmol, 60 mM) and 5 h (50 mg, 0.27 mmol, 40 mM). Glucose was added at different time point as described for the first run. After 67 h reaction, 80.1 mM (80.1%, 53 mg, 0.29 mmol) of (*R*)-**2** in 3.6 ml remaining reaction solution was formed, corresponding to a product concentration of 14.9 g/L. All results are shown in Figure 2.

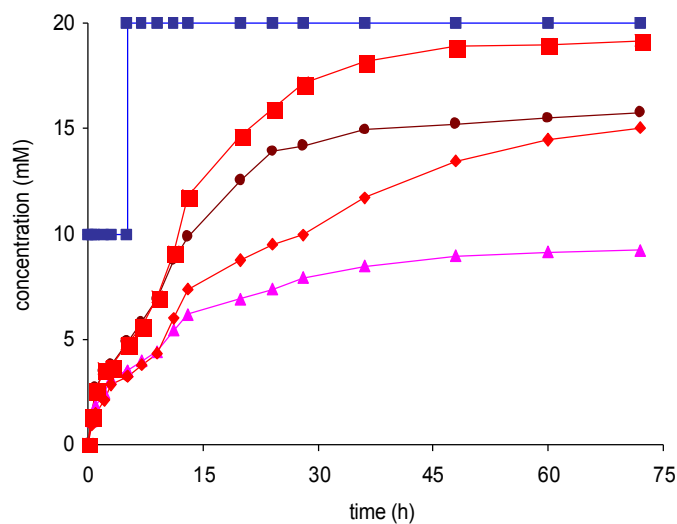

**Figure S-1.** Formation of (*R*)-**2** in the reduction of ethyl 3-keto-4,4,4-trifluoro-butyrate **1** (20 mM) with permeabilized cells of *B. pumilus* Phe-C3 (6.7 g cdw/L) and *B. subtilis* BGSC 1A1 at initial NADP<sup>+</sup> concentration of 0.20 mM, compared with the reduction with the whole cells of *B. pumilus* Phe-C3 (6.7 g cdw/L). (▲) whole cells of *B. pumilus* Phe-C3 with 55 mM glucose; (◆) permeabilized cells (1:2) with 55 mM glucose; (●) permeabilized cells (1:4) with 55 mM glucose; (■) permeabilized cells (1:4) with 110 mM glucose; (■) cumulative substrate **1**.

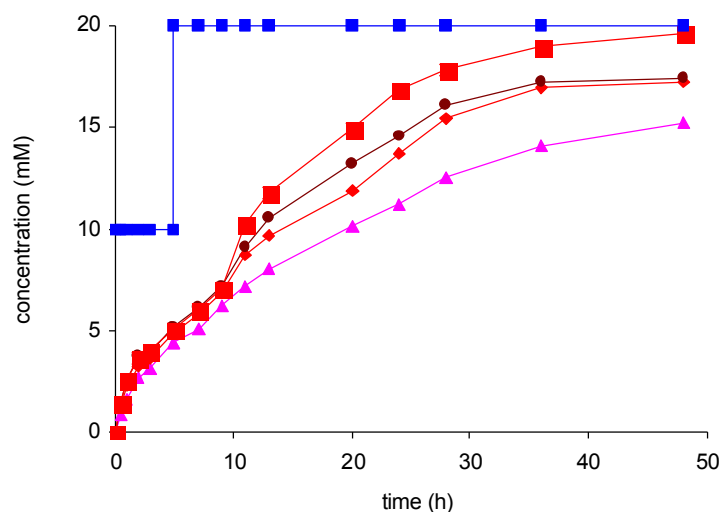

**Figure S-2.** Formation of (+)-4 in the reduction of methyl 3-keto-pyridine propionate **3** (20 mM) with permeabilized cells of *Pseudomonas* sp. Tyr-F10 (6.7 g cdw/L) and *B. subtilis* BGSC 1A1 at initial NADP<sup>+</sup> concentration of 0.20 mM, compared with the reduction with the whole cells of *Pseudomonas* sp. Tyr-F10 (6.7 g cdw/L). (▲) whole cells of *Pseudomonas* sp. Tyr-F10 with 55 mM glucose; (◆) permeabilized cells (1:2) with 55 mM glucose; (●) permeabilized cells (1:4) with 55 mM glucose; (■) permeabilized cells (1:4) with 110 mM glucose. (■) cumulative substrate **3**.

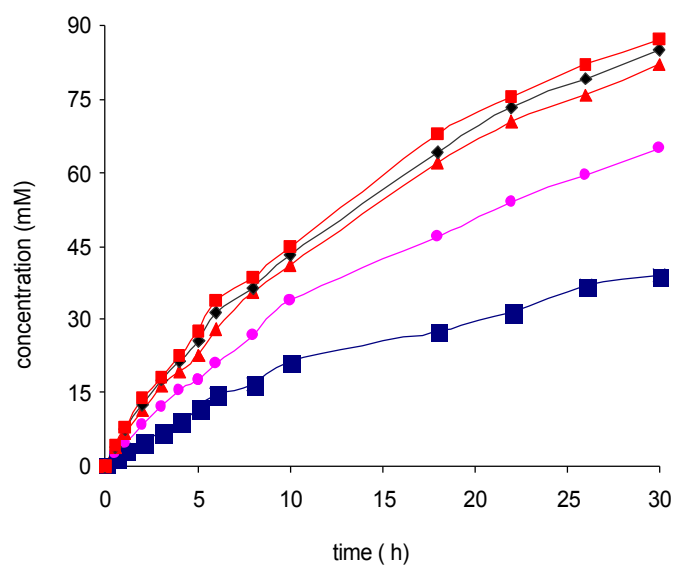

**Figure S-3.** Formation of (*R*)-2 in the bioreduction of ethyl 4,4,4-trifluorobutyrate **1** (120 mM) with permeabilized cells of *B. pumilus* Phe-C3 (20 g cdw/L) and *B. subtilis* BGSC 1A1(40 g cdw/L) at different NADP<sup>+</sup> concentrations. (■) 0.04 mM NADP<sup>+</sup>. (●) 0.08 mM NADP<sup>+</sup>. (▲) 0.12 mM NADP<sup>+</sup>. (◆) 0.16 mM NADP<sup>+</sup>. (■) 0.20 mM NADP<sup>+</sup>.

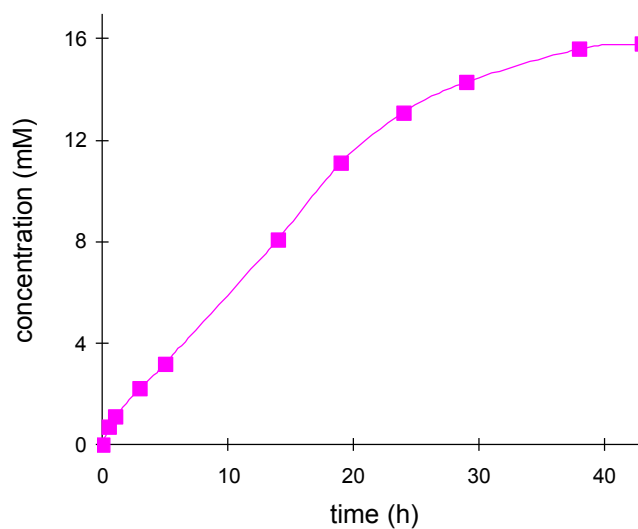

**Figure S-4.** Formation of (*R*)-**2** in the bioreduction of ethyl 4,4,4-trifluorobutyrate **1** (120 mM) with permeabilized cells of *B. pumilus* Phe-C3 (20 g cdw/L) and *B. subtilis* BGSC 1A1 (40 g cdw/L) at an initial NADP<sup>+</sup> concentration of 0.01 mM and a total glucose concentration of 2.42 M added at different time points.

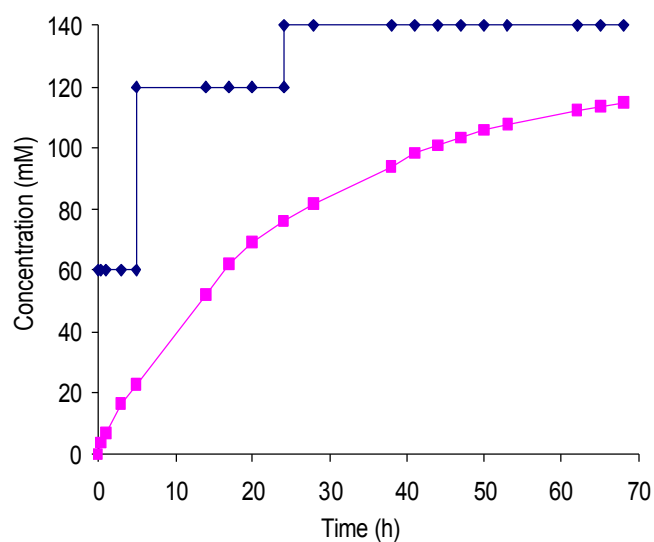

**Figure S-5.** Formation of (*R*)-**2** in the bioreduction of **1** (140 mM) with permeabilized cells of *Bacillus pumilus* Phe-C3 (20 g cdw/L) and *Bacillus subtilis* BGSC 1A1 (40 g cdw/L) at an initial NADP<sup>+</sup> concentration of 0.12 mM and a total glucose concentration of 3.63 M added at different time points. ♦ - cumulative substrate **1**; ■ - formed product (*R*)-**2**.
